# Supplementary material for: Layered SnSe2 microflakes and SnSe2/SnO2 heterojunctions for low-temperature chemiresistive-type gas sensing
Source: Royal Society of Chemistry journal article supplement (doi:10.1039/d0tc02589e), 2020-01-01
Supplement: d0tc02589e1.pdf [file d0tc02589e1.pdf]

## Layered SnSe<sub>2</sub> microflakes and SnSe<sub>2</sub>/SnO<sub>2</sub> heterojunctions for low-temperature chemiresistive-type gas sensing

Xinyu Li<sup>a</sup>, Wei Liu<sup>a</sup>, Baoyu Huang<sup>\*a</sup>, Hang Liu<sup>a</sup>, Xiaogan Li<sup>a\*</sup>

<sup>a</sup> School of Microelectronics, Key Lab. of Liaoning for Integrated Circuits Technology, Dalian University of Technology, China,

\*Corresponding authors. E-mail address: huangby@dlut.edu.cn (B. Huang), lixg@dlut.edu.cn (X. Li).

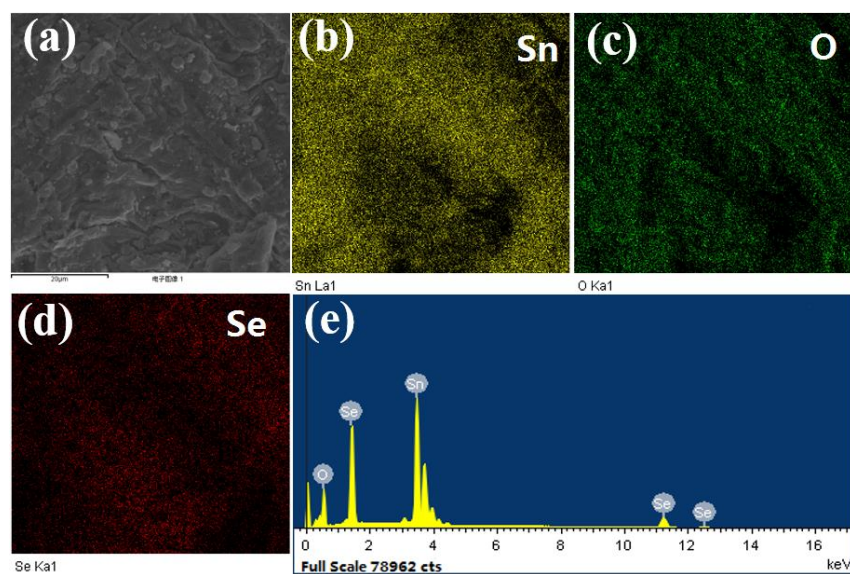

Fig.S1. (a) ~ (e) The EDS mapping analysis of SnSe<sub>2</sub>/SnO<sub>2</sub>.

**Table S1.** The results of the ratio of the integrated area under each peak in XPS.

| XPS – O 1s     | SnSe <sub>2</sub> | SnSe <sub>2</sub> /SnO <sub>2</sub> -400 | SnSe <sub>2</sub> /SnO <sub>2</sub> -500 | SnO <sub>2</sub> |
|----------------|-------------------|------------------------------------------|------------------------------------------|------------------|
| Area (530.7eV) | -                 | 38211.3                                  | 67447.0                                  | 83634.7          |
| Area (531.8eV) | 20831.3           | 16460.2                                  | 29141.4                                  | 22368.9          |

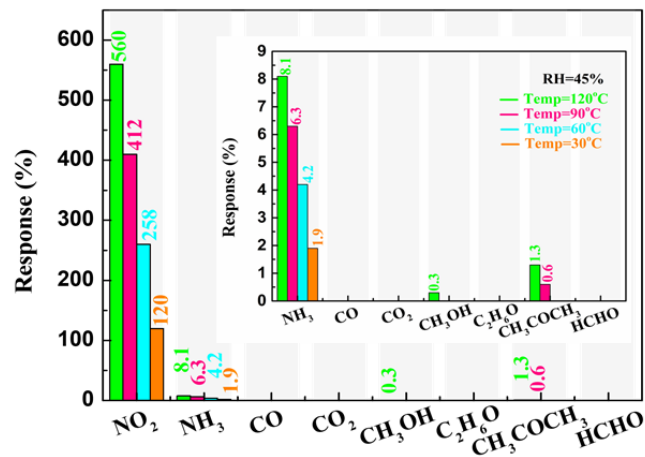

**Fig. S2.** Response of the SnSe<sub>2</sub>/SnO<sub>2</sub>-500°C-1h sensor to 8 ppm of NO<sub>2</sub>, ammonia, methanol, ethanol, acetone, and formaldehyde at different operating temperatures.

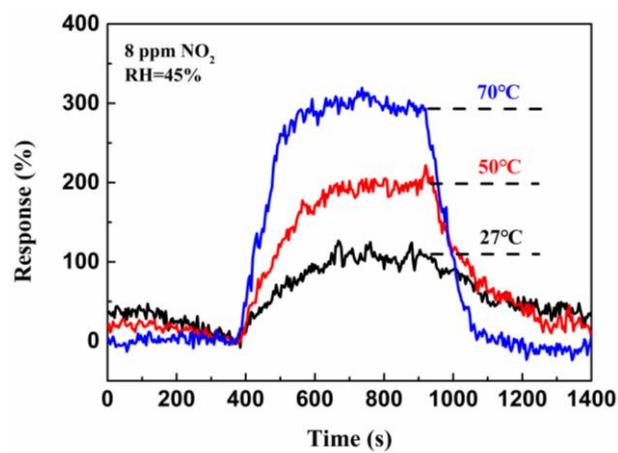

**Fig. S3.** Response of the SnSe<sub>2</sub>/SnO<sub>2</sub>-500°C-1h based sensor to 8 ppm NO<sub>2</sub> at different operating temperatures.

**Table S2.** The comparison between the response of SnSe<sub>2</sub> and SnSe<sub>2</sub>/SnO<sub>2</sub> heterojunctions to NO<sub>2</sub> and to NH<sub>3</sub>.

| Materials                           | R <sub>NO2</sub> | R <sub>NH3</sub> | R <sub>NO2</sub> / R <sub>NH3</sub> |
|-------------------------------------|------------------|------------------|-------------------------------------|
| SnSe <sub>2</sub>                   | 38.2%            | 7.4%             | 5.16                                |
| SnSe <sub>2</sub> /SnO <sub>2</sub> | 560%             | 8.1%             | 69.13                               |

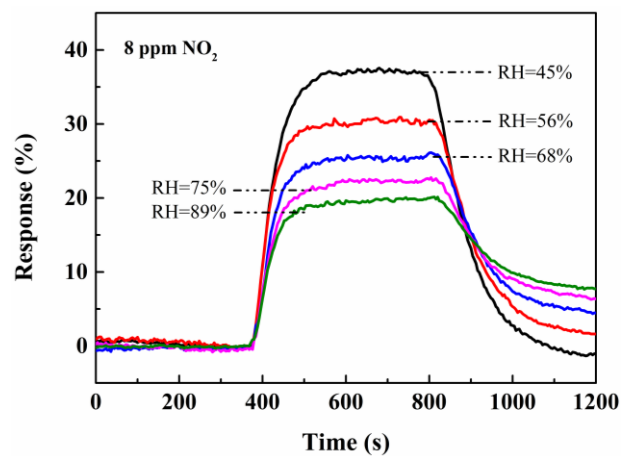

**Fig. S4.** The dynamic response curves of SnSe<sub>2</sub> sensor to NO<sub>2</sub> under different humidity conditions.

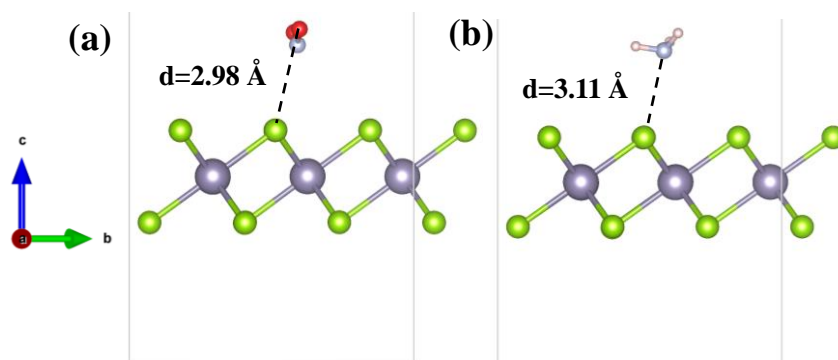

**Fig. S5.** The structure models of SnSe<sub>2</sub> with adsorbed NO<sub>2</sub> (a) and adsorbed NH<sub>3</sub> (b) molecules.
